# Supplementary material for: Effectiveness of Traditional Healers in Program to Control Leprosy in Nagan Raya District in Aceh
Source: Hindawi journal article supplement (doi:10.1155/2018/3176762), 2018-06-06
Supplement: f1 [file 3176762.f1.pdf]

## QUESTIONNAIRE

### EFFECTIVENESS OF THE ROLE OF TRADITIONAL HEALERS IN THE PROGRAM TO CONTROL LEPROSY IN NAGAN RAYA DISTRICT IN ACEH

Code Number of Respondent : ..... (to be completed by official)

Date Completed : ..... 2016 (to be completed by official)

#### Instructions For Completion :

*Put a tick in the checklist (✓) in the square which corresponds to your answer,*

#### A. Personal Data :

Age :

- |                                        |                                                 |
|----------------------------------------|-------------------------------------------------|
| <input type="checkbox"/> 20 – 35 years | <input type="checkbox"/> 36 – 45 years          |
| <input type="checkbox"/> 46 – 60 years | <input type="checkbox"/> More than 60 years old |

Highest Level of Education :

- |                                           |                                              |                                                      |
|-------------------------------------------|----------------------------------------------|------------------------------------------------------|
| <input type="checkbox"/> Higher Education | <input type="checkbox"/> High School equiv't | <input type="checkbox"/> Middle School or Equivalent |
| <input type="checkbox"/> Primary School   | <input type="checkbox"/> No Formal Schooling |                                                      |

Years Practicing as a Traditional Healer:

- ≤ 5 years
- > 5 years

#### B. Knowledge About Leprosy

##### **Instructions:**

*Put a cross (X) against the best alternative answer[s] a, b or c*

1. One of the signs of leprosy is:
  1. There is white skin with loss of feeling
  2. There is something different about the skin
  3. There is a lump under the skin
  
2. Leprosy is .....
  1. An Infectious Disease
  2. A Non Infectious Diseases
  3. A Curse from Allah
  
3. Leprosy is caused by....
  1. A Curse
  2. Torment by Satan
  3. An Infectious Disease

4. The cause of leprosy is.....
  1. A bacterial infection
  2. A fungal growth
  3. A curse
  
5. The leprosy bacteria get into the human body by.....
  1. The digestive system
  2. The hearing system
  3. The breathing system and through skin wounds
  
6. Leprosy only attacks.....
  1. Children
  2. People of all ages
  3. Pregnant women
  
7. The way to avoid leprosy is .....
  1. Improved cleanliness of house and environment
  2. Immunisation
  3. Having leprosy medicine ready at home
  
8. Leprosy can be spread by.....
  1. Saliva
  2. Inherited from parents
  3. Skin contact
  
9. Treatment of leprosy is provided by.....
  1. A Traditional Healer
  2. Doctors & nurses at a Health Centre
  3. Other leprosy patients
  
10. The place where treatment for leprosy is given is .....
  1. A Health Centre or Hospital
  2. The house of a Traditional Healer
  3. The home of the person with leprosy

### C. Attitude to Leprosy

**Instructions:**

Put a tick (✓) in the box for the alternative answer that you agree with for the statements below – choose from “Highly Agree, Agree, Neutral, Disagree and Highly Disagree”

| №  | STATEMENT                                                                                                 | ALTERNATIVE ANSWERS |       |         |             |                 |
|----|-----------------------------------------------------------------------------------------------------------|---------------------|-------|---------|-------------|-----------------|
|    |                                                                                                           | Highly Agree        | Agree | Neutral | Dis - agree | Highly Disagree |
| 1  | One way to avoid getting leprosy is to increase the bodies resistance.                                    |                     |       |         |             |                 |
| 2  | Preventing leprosy is better than treating it                                                             |                     |       |         |             |                 |
| 3  | To treat leprosy the patient should be taken to the health centre straight away to get regular treatment. |                     |       |         |             |                 |
| 4  | To avoid contact with the bacteria that causes leprosy people have to ensure cleanliness.                 |                     |       |         |             |                 |
| 5  | Before we give children food, they should wash their hands.                                               |                     |       |         |             |                 |
| 6  | To treat leprosy, the patient must be taken to the doctor or the health centre.                           |                     |       |         |             |                 |
| 7  | To avoid contact with the leprosy bacteria we must ensure the environment is clean.                       |                     |       |         |             |                 |
| 8  | Washing children 2 or 3 times a day is one way to avoid them getting leprosy                              |                     |       |         |             |                 |
| 9  | Avoding dirty, unhealthy places is one way to avoid the spread of leprosy.                                |                     |       |         |             |                 |
| 10 | Persons with leprosy shouldn't be isolated/banished.                                                      |                     |       |         |             |                 |

#### D. Role of the Traditional Healer

**Instructions:**

Put a tick (✓) in the box for the alternative answer that you agree with for the statements below – choose from “Always, Often, Sometimes, Rarely and Never”.

| NO | STATEMENTS                                                                                                        | ALTERNATIVE ANSWERS |       |            |        |       |
|----|-------------------------------------------------------------------------------------------------------------------|---------------------|-------|------------|--------|-------|
|    |                                                                                                                   | Always              | Often | Some-times | Rarely | Never |
| 1  | All people with leprosy go to the Traditional Healers.                                                            |                     |       |            |        |       |
| 2  | All people with leprosy are taken to the Health centre or Hospital by the Traditional Healers                     |                     |       |            |        |       |
| 3  | Traditional Healers give the villagers information about leprosy that is true and correct                         |                     |       |            |        |       |
| 4  | Villagers ask the Traditional Healers about leprosy.                                                              |                     |       |            |        |       |
| 5  | Traditional Healers believe that the cause of leprosy is a curse.                                                 |                     |       |            |        |       |
| 6  | Traditional Healers believe that leprosy patients have to be isolated from their family and from other villagers. |                     |       |            |        |       |
| 7  | Lepers who go to the Traditional Healer are given work..                                                          |                     |       |            |        |       |
| 8  | Lepers who go to the Traditional Healer can work like other people.                                               |                     |       |            |        |       |
